# Supplementary material for: Southern Ocean polynyas and dense water formation in a high-resolution, coupled Earth system model
Source: Copernicus journal article supplement (doi:10.5194/tc-17-2681-2023), 2023-07-11
Supplement: Supplementary file 1 [file tc-17-2681-2023-supplement.pdf]

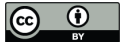

*Supplement of*

## **Southern Ocean polynyas and dense water formation in a high-resolution, coupled Earth system model**

**Hyein Jeong et al.**

*Correspondence to:* Hyein Jeong ([hijeong820310@gmail.com](mailto:hijeong820310@gmail.com))

The copyright of individual parts of the supplement might differ from the article licence.

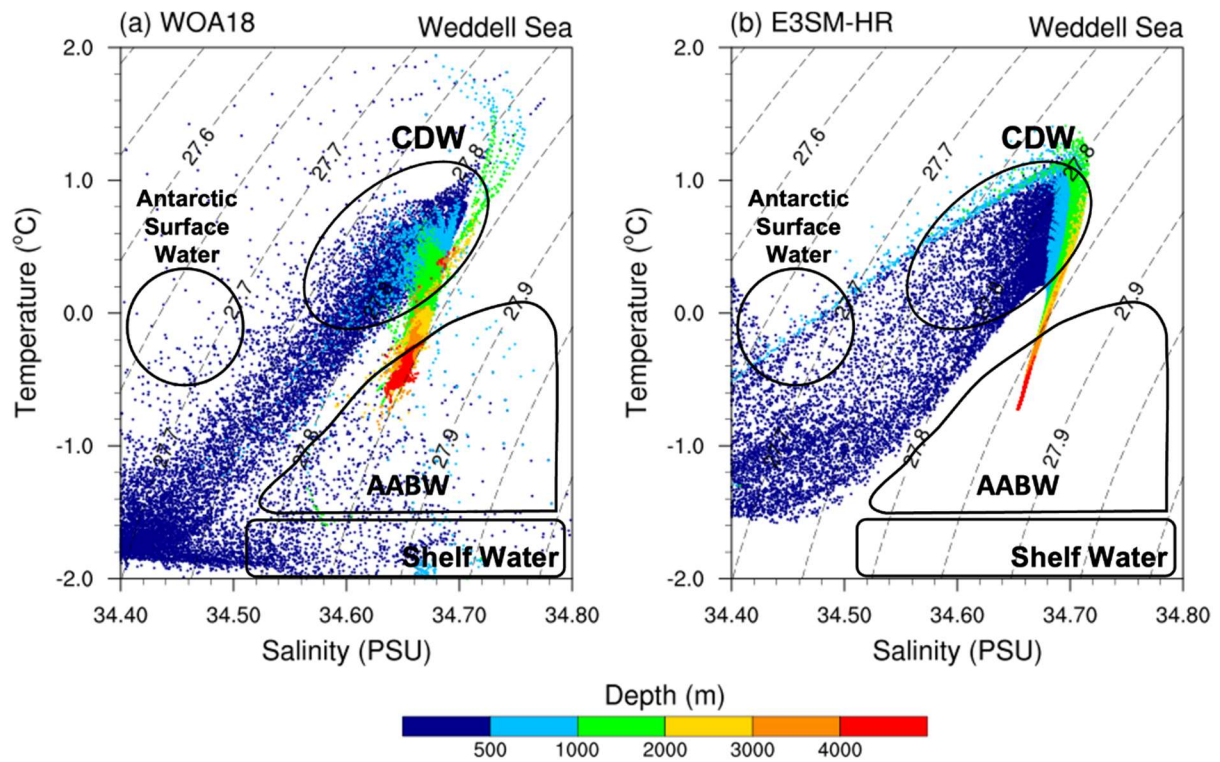

**Figure S1.** Potential temperature/salinity (TS) diagrams in the Weddell Sea (south of 60°S and within longitudes 60°W-0°, full depth range) for **(a)** WOA18 and **(b)** E3SM-HR. Color coding indicates depth (m). Boxes show definition of main Southern Ocean water masses, as seen in Fig. 1a of Whitworth et al. (1998).

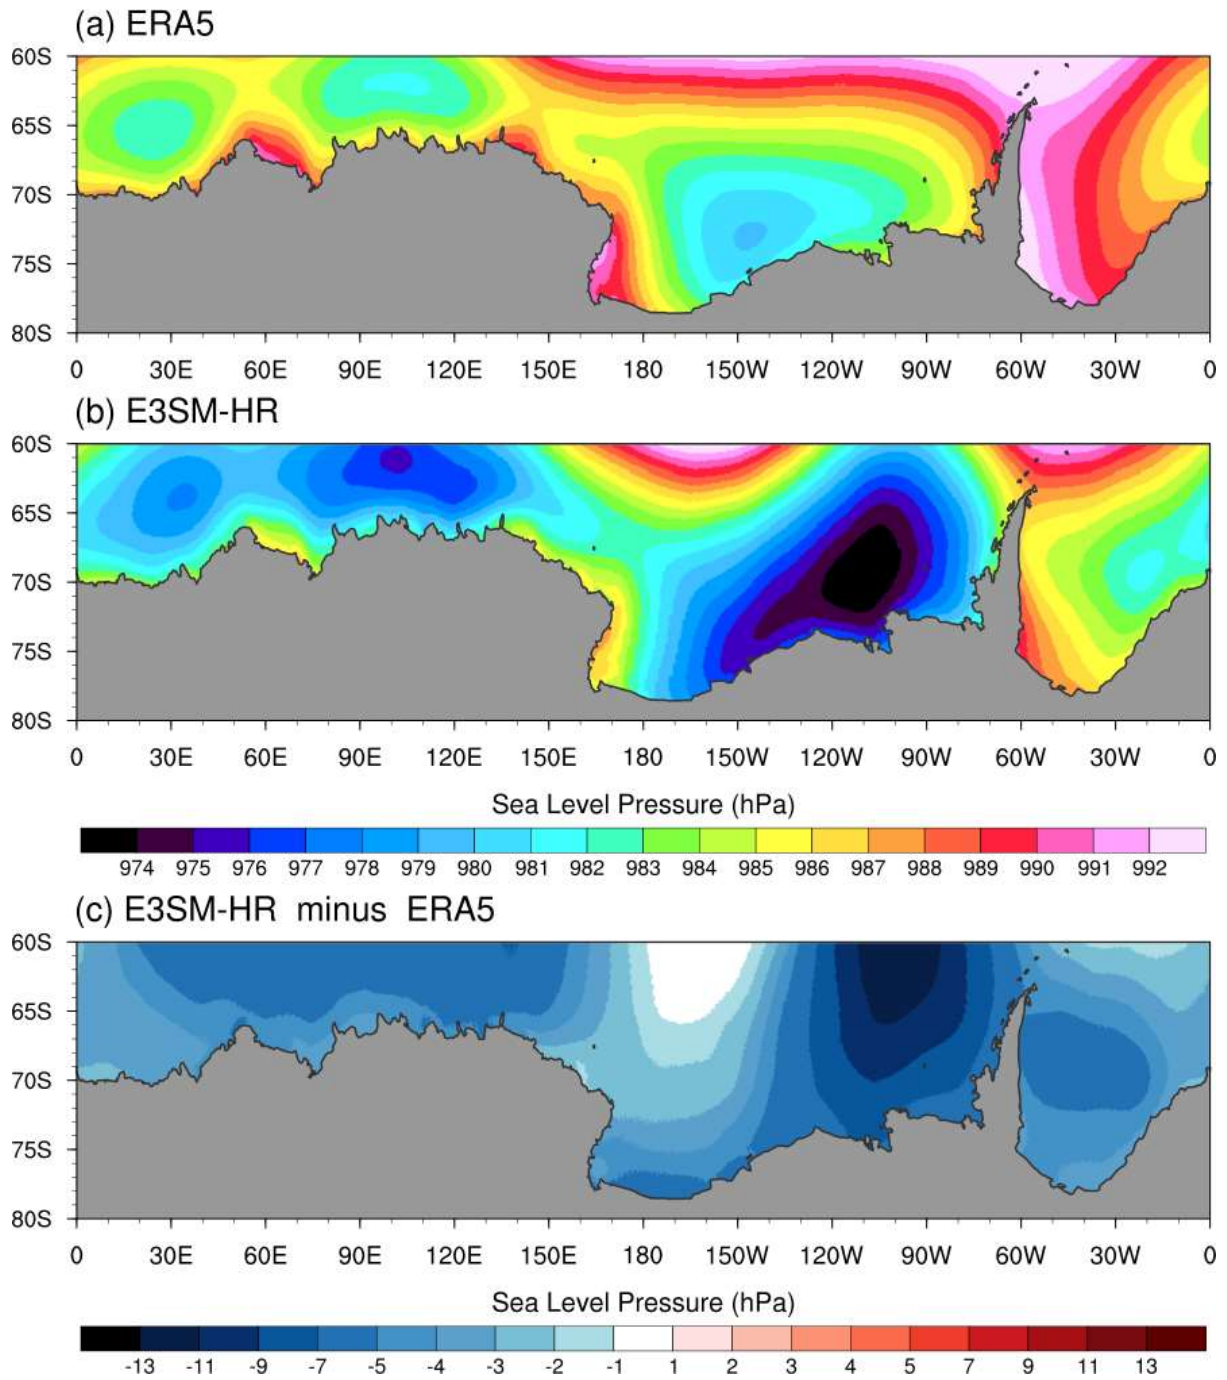

**Figure S2.** Climatological sea level pressure (hPa) in the winter (from March to October) for (a) ERA5 and (b) E3SM-HR. (c) Difference between E3SM-HR and ERA5 results.

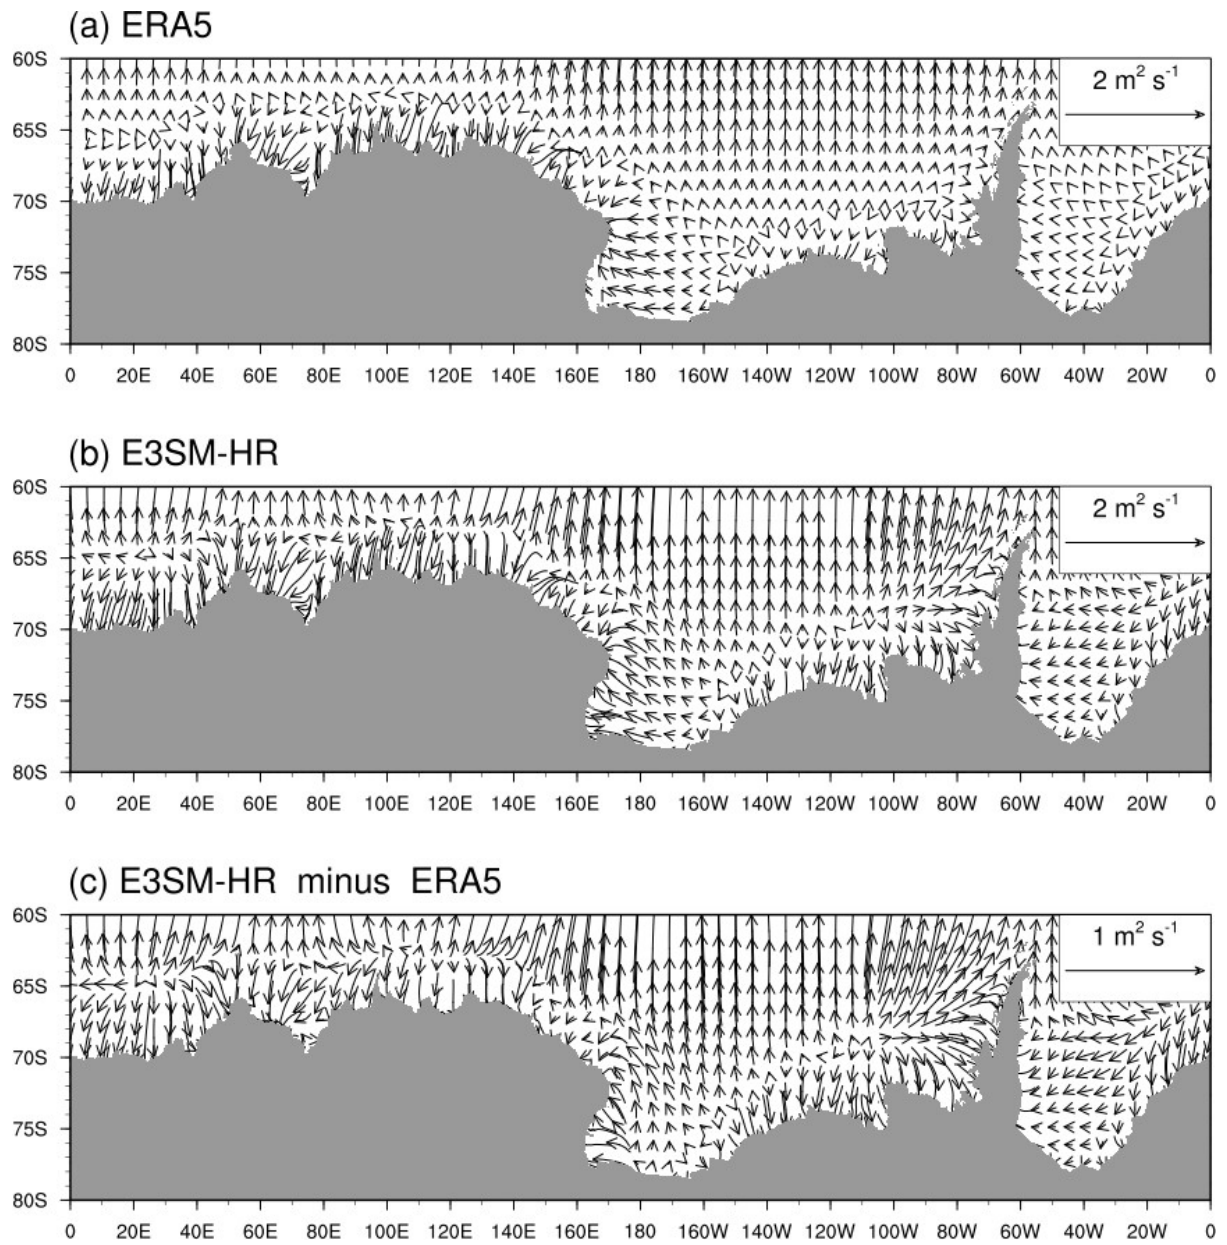

**Figure S3.** Ekman transport from (a) ERA5 and (b) E3SM-HR. (c) Difference between E3SM-HR and ERA5 Ekman transport.

## References

Whitworth, III, T., Orsi, A. H., Kim, S.-J., Nowlin Jr., W. D., and Locarnini, R. A.: Water Masses and Mixing Near the Antarctic Slope Front, vol. 75, pp. 1–27, American Geophysical Union (AGU), <https://doi.org/10.1029/AR075p0001>, 1998.
